# Supplementary material for: Benzothienopyrimidine as a co-planar type rigid acceptor for high external quantum efficiency in thermally activated delayed fluorescence emitters
Source: Royal Society of Chemistry journal article supplement (doi:10.1039/c9tc01993f), 2019-01-01
Supplement: c9tc01993f1.pdf [file c9tc01993f1.pdf]

## Supporting information

### **Benzothienopyrimidine as a co-planar type rigid acceptor for high external quantum efficiency in thermally activated delayed fluorescent emitters**

Chan Seok Oh<sup>1+</sup>, Ha Lim Lee<sup>1+</sup>, Wan Pyo Hong<sup>2\*</sup>, Jun Yeob Lee<sup>1\*</sup>

<sup>1</sup>School of Chemical Engineering, Sungkyunkwan University  
2066, Seobu-ro, Jangan-gu, Suwon, Gyeonggi, 440-746, Korea

<sup>2</sup> LG Chem, Ltd, LG Science Park, 30, Magokjungang 10-ro, Gangseo-gu, Seoul, 07796, Republic of Korea

+ Chan Seok Oh and Ha Lim Lee contributed equally.

\* Corresponding author  
E-mail: [leej17@skku.edu](mailto:leej17@skku.edu)

Keywords: efficiency, acceptor, thermally activated delayed fluorescence, benzothienopyrimidine

## List of Figures

**Figure S1.** The cyclic voltammetry curves of BTPAc and BTPCNAc emitters.

**Figure S2.** The temperature-dependent transient PL curves of (a) BTPAc and (b) BTPCNAc

**Figure S3.** DSC thermogram of the BTPAc and BTPCNAc emitters.

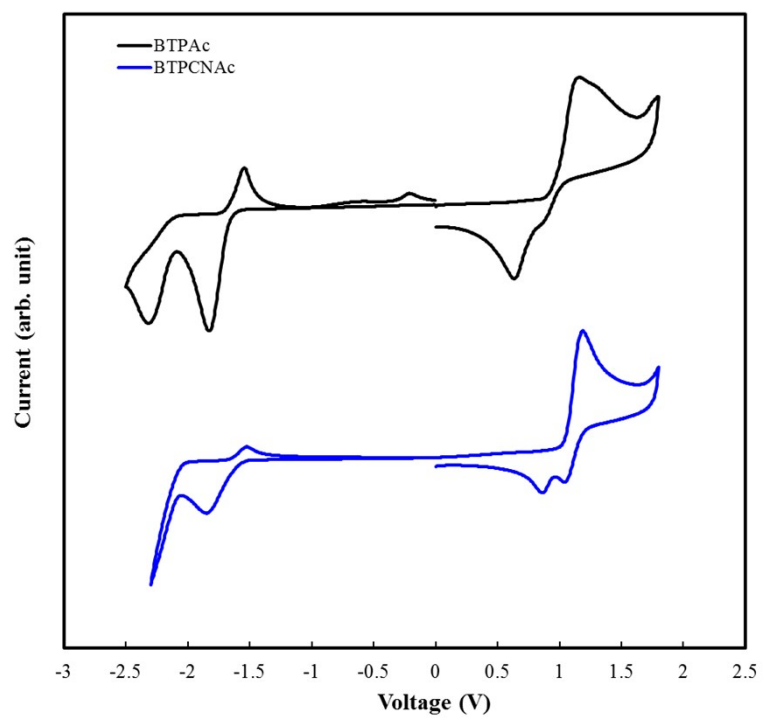

Figure S1.

(a)

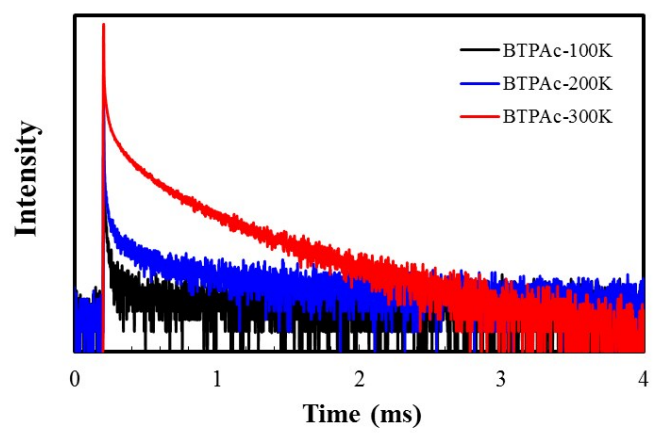

(b)

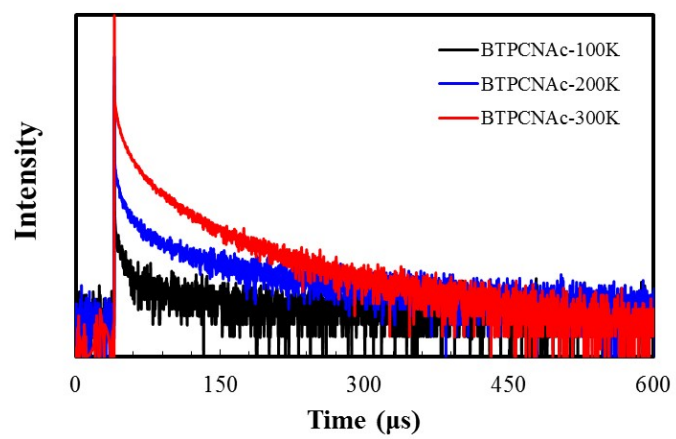

Figure S2.

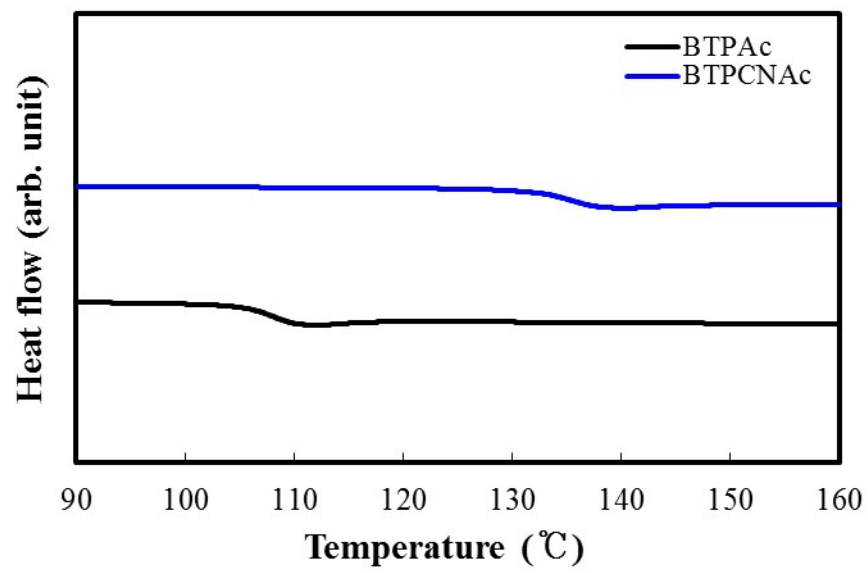

Figure S3
